# Supplementary material for: Exosomes derived from olfactory ensheathing cells provided neuroprotection for spinal cord injury by switching the phenotype of macrophages/microglia
Source: PubMed Central journal article supplement (PMC9115713; doi:10.1002/btm2.10287), 2021-12-28

## Supplementary materials

**Supplementary Figure 1.** Purity of primary cultured microglia. (A) Phase-contrast image of primary cultured microglia. (B) Purity of microglia was identified by Iba1 staining. Scale bar = 30  $\mu$ m. (C) Quantification of the Iba1-positive microglia. Note that about 90% of the cells are Iba1 positive.

**Supplementary Figure 2.** Effects of OECs-Exo on expression of IRF3 and p-c-Jun upon LPS treatment. (A) The mRNA level of IRF3 in microglia under normal condition, LPS or LPS plus OECs-Exo treatment. (B) Quantification of expression level of p-c-Jun in microglia under control, LPS or LPS plus OECs-Exo treatment. N = 3, \*P < 0.05, \*\*P < 0.01. (C) Immunostaining of p-c-Jun and F4/80. Scale bar = 30  $\mu$ m. (D-E) Quantification of the IFI/area and the nuclei/cytosol fluorescence intensity ratio of p-c-Jun. Note that OECs-Exo significantly suppressed the increased IFI and nuclear translocation of p-c-Jun induced by LPS. N = 3, \*P < 0.05, \*\*P < 0.01, \*\*\*P < 0.001.

**Supplementary Figure 3.** (A) Representative confocal microscopy images showing uptake of OECs-Exo (red) by microglia/macrophages (green) in spinal cord at 1dpi, 5dpi, 10dpi. Scale bar=50  $\mu$ m. (B) Quantification of the percentage of internalization of OECs-Exo by microglia/macrophages. Results are presented as mean  $\pm$  SEM. N = 3/group.

**Supplementary Figure 4.** Full gels of CD63, CD9, pNF- $\kappa$ B, NF200, p-c-Jun,  $\beta$ -actin and GAPDH.

**Sup Table 1.** PCR primer sequences

| Gene         | Forward primer (5'-3')  | Reverse primer (5'-3')    |
|--------------|-------------------------|---------------------------|
| iNOS         | GCCTAGTCAACTACAAGCCCC   | AGAAACTTCCAGGGGCAAGC      |
| CD86         | AGACATGTGTAACCTGCACCAT  | ACTTTTTCCGGTCCTGCCAA      |
| IL-12        | GTGTCAATCACGCTACCTCCT   | CTTGGCAGGTCCAGAGACTG      |
| IL-18        | CAGCTCTTCTACCAGCAAACAT  | CTTCCAAGTCCAGAGGCTGTGC    |
| CD206        | GAGGACTGCGTGGTGATGAA    | CATGCCGTTTCCAGCCTTTC      |
| Arginase1    | AAGATGTGCCCTCTGTCTTTTAG | CCCCTCCTCGAGGCTGTC        |
| IL-4         | CCTTGCTGTCAACCCTGTTCT   | CGGTGCAITGGAGTCCCTTTT     |
| IL-10        | CGCTGTCATCGATTTCTCCC    | TAGACACCTTTGTCTTGGAGCTTAT |
| TNF $\alpha$ | ATGGGCTCCCTCTCATCAGT    | GCTTGGTGGTTTGTCTACGAC     |
| IRF-3        | TGGCTGCGAGTCTCAACTAC    | CAGTTCCTGAGCCAGGGGAG      |
| GAPDH        | GGCTCTCTGCTCCTCCCT      | GTCTATGAGACGAGGCTGGC      |

# Sup Figure 1

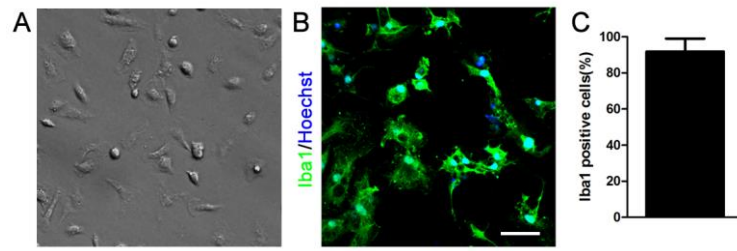

Sup Figure 2

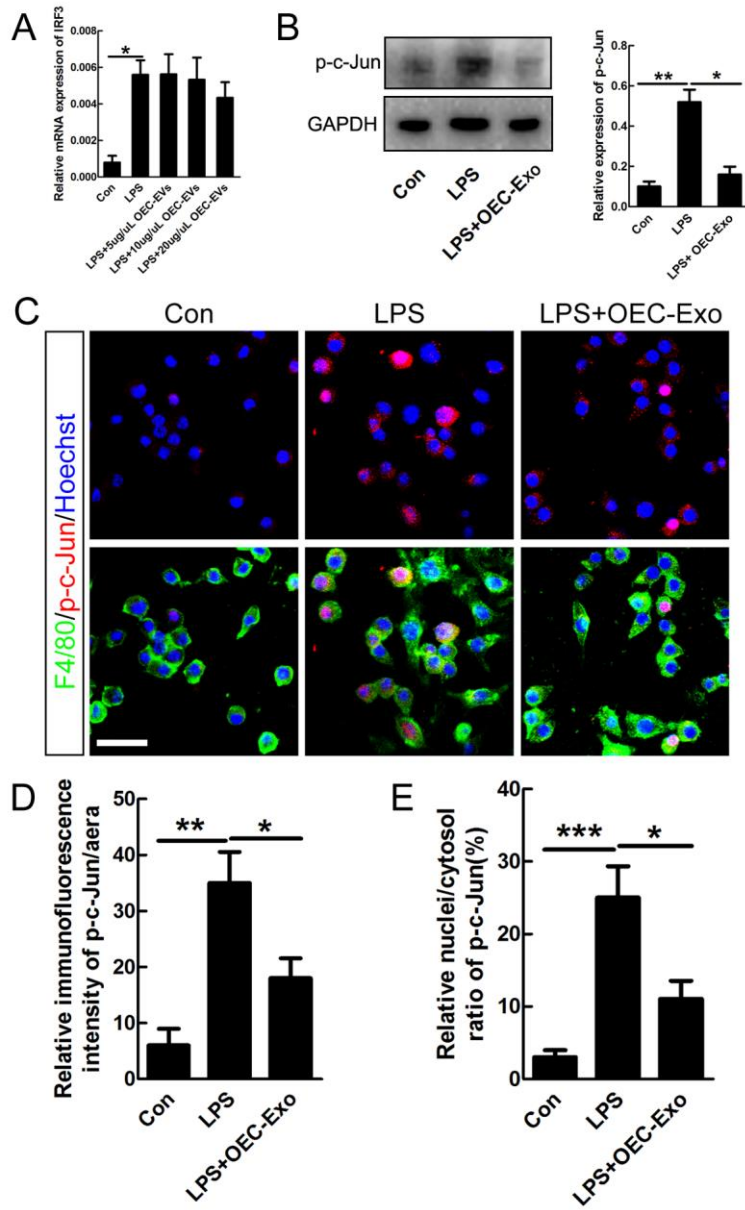

Sup Figure 3

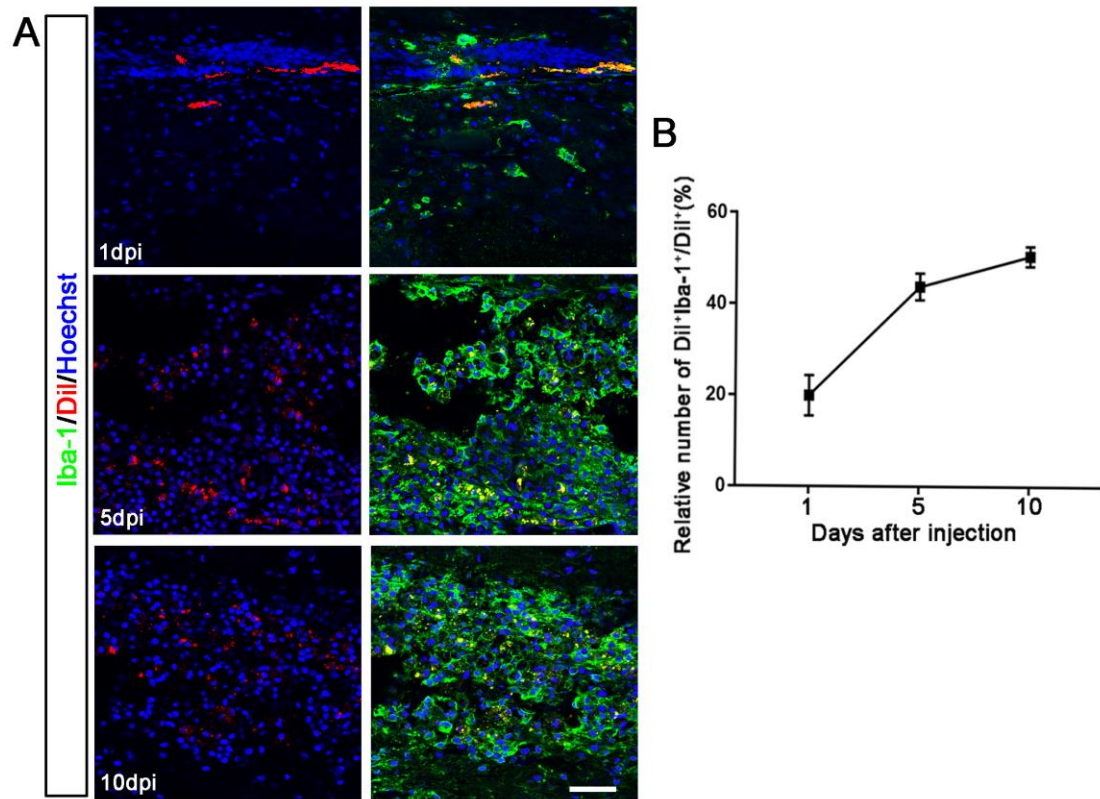

# Sup Figure 4

## Fig 1F

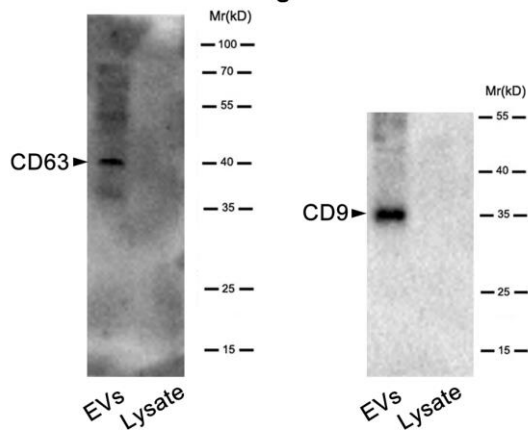

## Fig 4A

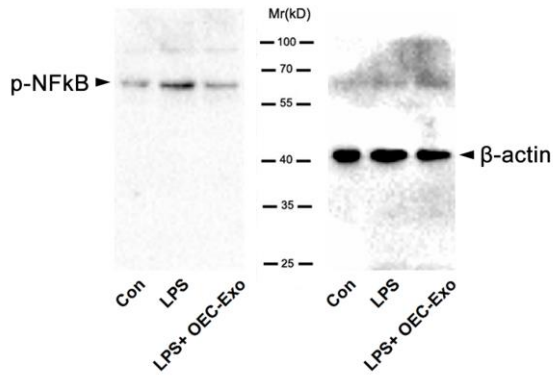

## Fig 6G

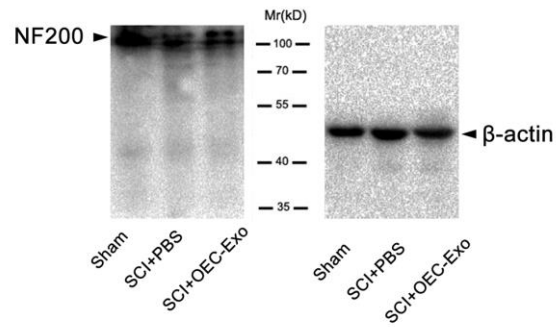

## sup Fig 2B

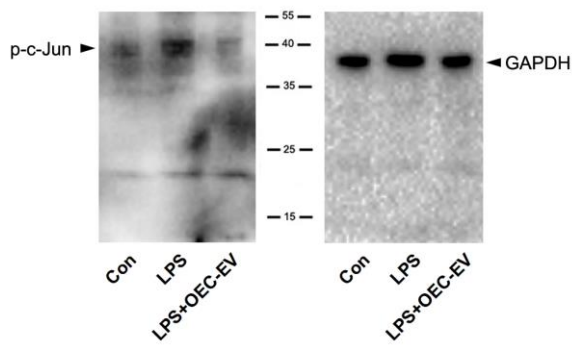

Supplement: BTM2-7-e10287-s001.pdf [file BTM2-7-e10287-s001.pdf]
